# Supplementary material for: Mixed ionic liquid/organic carbonate electrolytes for LiNi0.8Co0.15Al0.05O2 electrodes at various temperatures
Source: Royal Society of Chemistry journal article supplement (doi:10.1039/c5ra21386j), 2015-01-01
Supplement: c5ra21386j1.pdf [file c5ra21386j1.pdf]

**Table S1.** Fitting values of VTF parameters for various electrolytes.

| Electrolyte system   | $\sigma_0$ (mS cm <sup>-1</sup> ) | E <sub>a</sub> (kJ mole <sup>-1</sup> ) | T <sub>0</sub> (K) | R <sup>2</sup> |
|----------------------|-----------------------------------|-----------------------------------------|--------------------|----------------|
| 0% IL incorporation  | 3.41                              | 0.58                                    | 240                | 0.999          |
| 25% IL incorporation | 3.45                              | 1.08                                    | 205                | 0.999          |
| 50% IL incorporation | 3.75                              | 2.03                                    | 192                | 0.999          |
| 75% IL incorporation | 4.59                              | 3.82                                    | 183                | 0.999          |

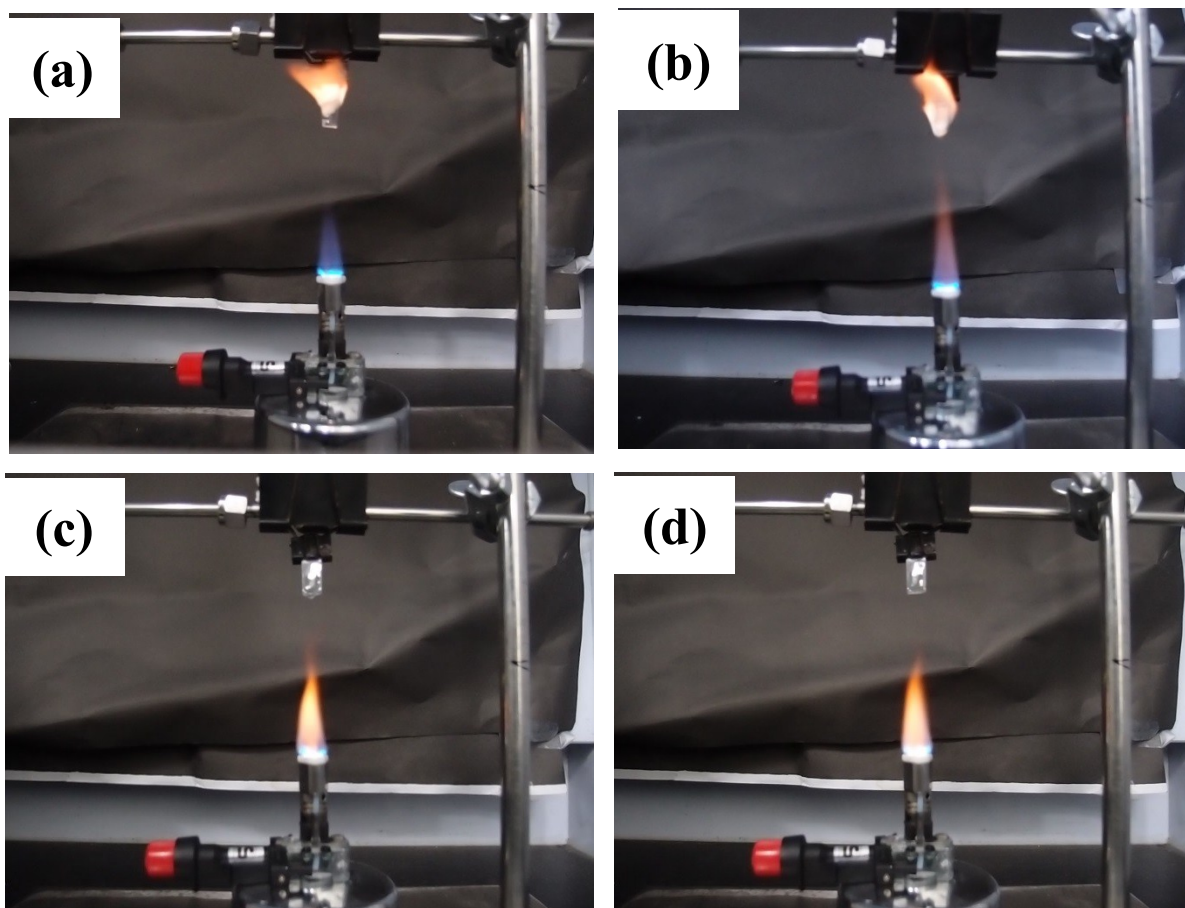

**Fig. S1.** Flammability tests of (a) 0%, (b) 25%, (c) 50%, and (d) 75% IL-incorporated electrolytes.

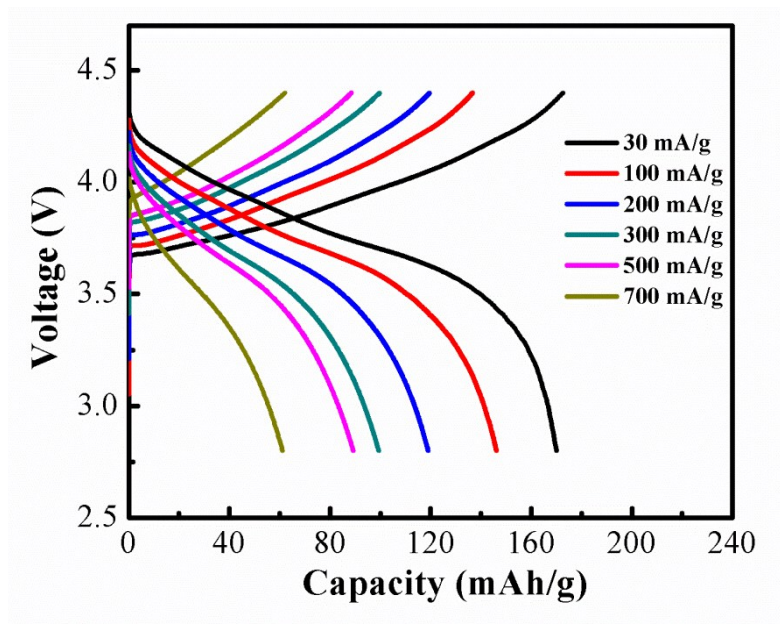

**Fig. S2.** Charge–discharge curves of an LNCA electrode recorded at various current densities in conventional organic electrolyte (1 M LiPF<sub>6</sub> in EC/DEC) at 25 °C.

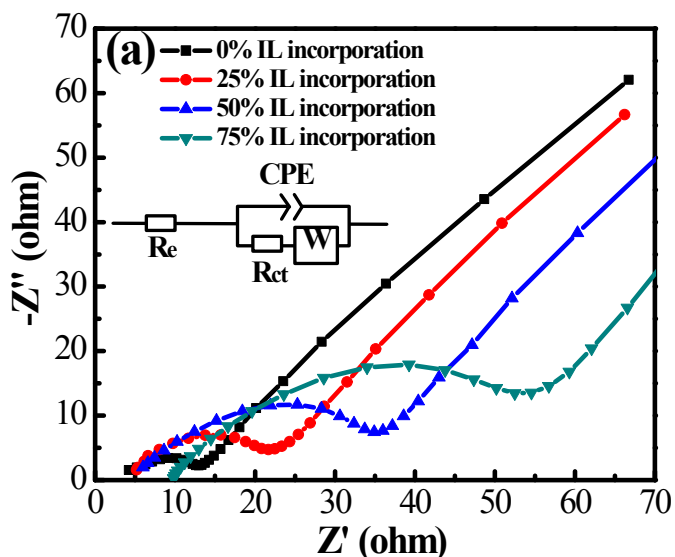

25 °C

| Electrolyte | Re ( $\Omega$ ) | Rct ( $\Omega$ ) | Li <sup>+</sup> diffusion coefficient ( $\text{cm}^2 \text{s}^{-1}$ ) |
|-------------|-----------------|------------------|-----------------------------------------------------------------------|
| 0 % IL      | 4.2             | 8.8              | $4.5 \times 10^{-11}$                                                 |
| 25 % IL     | 5.2             | 16.5             | $4.3 \times 10^{-11}$                                                 |
| 50 % IL     | 6.0             | 29.0             | $4.3 \times 10^{-11}$                                                 |
| 75 % IL     | 10.0            | 42.6             | $4.2 \times 10^{-11}$                                                 |

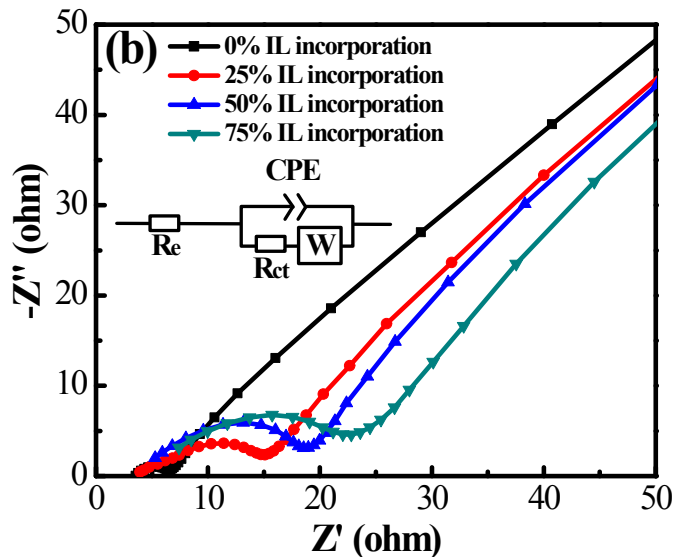

50 °C

| Electrolyte | Re ( $\Omega$ ) | Rct ( $\Omega$ ) | Li <sup>+</sup> diffusion coefficient ( $\text{cm}^2 \text{s}^{-1}$ ) |
|-------------|-----------------|------------------|-----------------------------------------------------------------------|
| 0 % IL      | 3.6             | 2.9              | $7.4 \times 10^{-11}$                                                 |
| 25 % IL     | 4.0             | 11.2             | $7.1 \times 10^{-11}$                                                 |
| 50 % IL     | 5.3             | 13.3             | $6.7 \times 10^{-11}$                                                 |
| 75 % IL     | 7.4             | 15.4             | $6.4 \times 10^{-11}$                                                 |

**Fig. S3.** Electrochemical impedance spectroscopy data of LNCA electrodes in various electrolytes at (a) 25 °C and (b) 50 °C acquired in CR2032 coin cells with Li foil as counter electrodes. The frequency range and AC amplitude are  $10^5$ – $10^{-2}$  Hz and 10 mV, respectively. The Re, Rct, CPE, and W in the equivalent circuit represent electrolyte resistance, interfacial charge transfer resistance, constant-phase element at the electrode/electrolyte interface, and Warburg impedance, respectively.

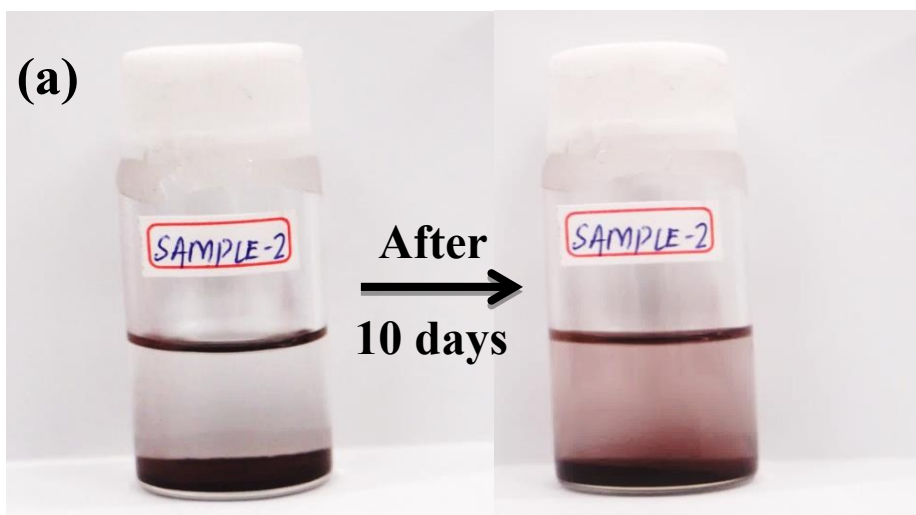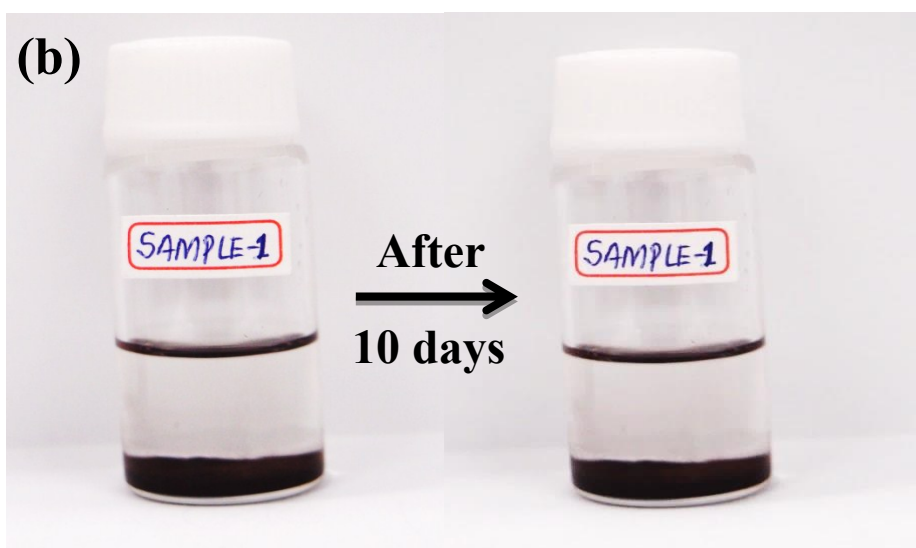

**Fig. S4.** Immersion tests of LNCA powder in (a) 0% IL-incorporated and (b) 75% IL-incorporated electrolytes at 80 °C for 10 days.
